# Supplementary material
Source: PubMed Central journal article supplement (PMC11234902)
Supplement: NIHMS2002961-supplement-Supplementary_Information.pdf [file NIHMS2002961-supplement-Supplementary_Information.pdf]

# **LY6E is a pan-coronavirus restriction factor in the respiratory tract**

---

In the format provided by the authors and unedited

Supplementary Table 1. Scoring for features of acute pneumonia for Fig. 3e.

| Mouse      | Relative weight at 3 dpi | Perivascular inflammation (0-3) | Alveolar inflammation (0-3) | Pleural inflammation (0-3) | Hemorrhage (0-3) | Edema (0-3) | Total score (out of 15) |
|------------|--------------------------|---------------------------------|-----------------------------|----------------------------|------------------|-------------|-------------------------|
| Wildtype 1 | 98.2                     | 0                               | 0                           | 0                          | 0                | 0           | 0                       |
| Wildtype 2 | 100.0                    | 1                               | 0                           | 0                          | 0                | 0           | 1                       |
| Wildtype 3 | 98.0                     | 1                               | 0                           | 0                          | 0                | 0           | 1                       |
| Wildtype 4 | 92.3                     | 1                               | 0                           | 0                          | 0                | 0           | 1                       |
| Wildtype 5 | 100.0                    | 1                               | 0                           | 0                          | 0                | 0           | 1                       |
| Wildtype 6 | 101.4                    | 1                               | 0                           | 0                          | 0                | 0           | 1                       |
| Wildtype 7 | 101.4                    | 1                               | 0                           | 0                          | 0                | 0           | 1                       |
| Wildtype 8 | 103.8                    | 1                               | 0                           | 0                          | 0                | 0           | 1                       |
| Wildtype 9 | 92.8                     | 2                               | 1                           | 0                          | 0                | 0           | 3                       |
| Knockout 1 | 92.5                     | 2                               | 0                           | 0                          | 0                | 0           | 2                       |
| Knockout 2 | 87.6                     | 2                               | 0                           | 0                          | 1                | 0           | 3                       |
| Knockout 3 | 87.8                     | 1                               | 0                           | 0                          | 1                | 0           | 2                       |
| Knockout 4 | 92.5                     | 0                               | 0                           | 0                          | 0                | 0           | 0                       |
| Knockout 5 | 90.1                     | 0                               | 0                           | 0                          | 0                | 0           | 0                       |
| Knockout 6 | 89.7                     | 1                               | 0                           | 0                          | 0                | 0           | 1                       |
| Knockout 7 | 86.3                     | 2                               | 2                           | 1                          | 1                | 0           | 6                       |
| Knockout 8 | 87.8                     | 1                               | 0                           | 1                          | 0                | 0           | 2                       |
| Knockout 9 | 82.5                     | 2                               | 1                           | 1                          | 1                | 1           | 6                       |

Supplementary Table 2. Automated quantitation of CD45 and SARS-CoV-2 nucleocapsid immunostaining for Fig. 3g-h, i-j.

| Mouse      | Relative weight at 3 dpi | % CD45+ cells | CD45 H-score | % SARS-CoV-2 nucleocapsid+ | SARS-CoV-2 nucleocapsid H-score |
|------------|--------------------------|---------------|--------------|----------------------------|---------------------------------|
| Wildtype 1 | 98.2                     | 27.1          | 32.7         | 0.1                        | 0.1                             |
| Wildtype 2 | 100.0                    | 29.9          | 34.9         | 0.4                        | 0.5                             |
| Wildtype 3 | 98.0                     | 28.1          | 33.0         | 0.6                        | 0.9                             |
| Wildtype 4 | 92.3                     | 26.9          | 31.4         | 1.5                        | 2.0                             |
| Wildtype 5 | 100.0                    | 27.2          | 31.6         | 0.5                        | 0.6                             |
| Wildtype 6 | 101.4                    | 29.4          | 33.9         | 0.3                        | 0.3                             |
| Wildtype 7 | 101.4                    | not stained   | not stained  | not stained                | not stained                     |
| Wildtype 8 | 103.8                    | not stained   | not stained  | not stained                | not stained                     |
| Wildtype 9 | 92.8                     | not stained   | not stained  | not stained                | not stained                     |
| Knockout 1 | 92.5                     | 26.0          | 31.3         | 11.7                       | 15.6                            |
| Knockout 2 | 87.6                     | 32.0          | 42.1         | 15.4                       | 20.1                            |
| Knockout 3 | 87.8                     | 27.6          | 34.1         | 7.6                        | 10.6                            |
| Knockout 4 | 92.5                     | 30.2          | 36.9         | 5.4                        | 6.6                             |
| Knockout 5 | 90.1                     | 21.2          | 24.6         | 6.9                        | 8.6                             |
| Knockout 6 | 89.7                     | 26.8          | 31.5         | 8.2                        | 10.0                            |
| Knockout 7 | 86.3                     | not stained   | not stained  | not stained                | not stained                     |
| Knockout 8 | 87.8                     | not stained   | not stained  | not stained                | not stained                     |
| Knockout 9 | 82.5                     | not stained   | not stained  | not stained                | not stained                     |

Supplementary Table 3. Oligos for targeting human LY6E using lentiCRISPRv2

|                              |                           |
|------------------------------|---------------------------|
| Human LY6E sgRNA #4 forward  | caccgGCCGACCATCTGCTCCGACC |
| Human LY6E sgRNA #4 reverse  | aaacGGTCCGAGCAGATGGTCGGCc |
| Human LY6E sgRNA #12 forward | caccgATTGCTCTTCTGGTTCAAGC |
| Human LY6E sgRNA #12 reverse | aaacGCTTGAACCAGAAGAGCAATc |

Supplementary Table 4. *Mus musculus Scgb1a1* probes.

|      |                                                   |                                                    |
|------|---------------------------------------------------|----------------------------------------------------|
| B4P1 | CCTCAACCTACCTCCAACAAGATGTGGGGTGATGTTG<br>TAATGTGT | TAGAGTTGGAGGCTTTGGTGTCTGATTCTCACCATATTCGC<br>TTC   |
| B4P2 | CCTCAACCTACCTCCAACAAGATGGACAGCATGACC<br>ACAGTGAT  | AGATGTCCGAAGAAGCTGAGCTGCAATTCTCACCATATTCGC<br>TTC  |
| B4P3 | CCTCAACCTACCTCCAACAATAACCAGACTCTGATTCC<br>ATGAGGA | GGGTTGAAAGGCTTCAGGGATGCCAATTCTCACCATATTCGC<br>CTTC |
| B4P4 | CCTCAACCTACCTCCAACAATTCAGCTGGGTGCCCGC<br>ATTTTGCA | TCTTGTGGGAGGGTATCCACCAGTCATTCTCACCATATTCGC<br>TTC  |
| B4P5 | CCTCAACCTACCTCCAACAATTTTCTCCGTGAGCTTC<br>ATGATGT  | TCTTGCTTACACAGAGGACTTGTTAATTCTCACCATATTCGC<br>TTC  |
| B4P6 | CCTCAACCTACCTCCAACAATTTAGCAGTAGAATATCT<br>CTGAAAT | CGAGGAGACACAGGGCAGTGACAAGATTCTCACCATATTCGC<br>CTTC |
| B4P7 | CCTCAACCTACCTCCAACAAGAAGGAGGGGTTGGTGT<br>GGGAAGC  | GAGATGCTCGCAGTTTATTGCAAAGATTCTCACCATATTCGC<br>TTC  |

Supplementary Table 5. *Mus musculus Sftpc* probes.

|       |                                                     |                                                    |
|-------|-----------------------------------------------------|----------------------------------------------------|
| B4P1  | CCTCAACCTACCTCCAACAACCTCTCTCTCTCTCTCTCT<br>CCTCATCT | GCTACTCATGTCCATTTTGTAAAGGTATTCTCACCATATTCGC<br>TTC |
| B4P2  | CCTCAACCTACCTCCAACAACCTGGGACCTGCCGAG<br>TAATCCGGT   | GGGACAGCAGGGGATGCGGAACTGGATTCTCACCATATTCGC<br>CTTC |
| B4P3  | CCTCAACCTACCTCCAACAACCACCACCACAACCAC<br>GATGAGAA    | GCCCCTACAATCACCACGACAACGAATTC<br>TCACCATATTCGCTTC  |
| B4P4  | CCTCAACCTACCTCCAACAATCTCAGTATGTTTTGA<br>CTCATGT     | GGTGCTCCGATGCTCATCTCAAGGAATTCTCACCATATTCGC<br>TTC  |
| B4P5  | CCTCAACCTACCTCCAACAATGGTGTCTGCTCGCTCA<br>CTCGGGGC   | CAGTGGAGCCGATGAAAAGGTAGCATTCTCACCATATTCGC<br>CTTC  |
| B4P6  | CCTCAACCTACCTCCAACAACCTGGAGCTGGCTTATAG<br>GCCGTCAG  | CCATCTTCATGATGTAGCAGTAGGTATTCTCACCATATTCGC<br>TTC  |
| B4P7  | CCTCAACCTACCTCCAACAATAAGCCTCAAGACTAGG<br>GATGCTCT   | GCCTGGAAGTCTGGAGTTTTCTAGATTCTCACCATATTCGC<br>TTC   |
| B4P8  | CCTCAACCTACCTCCAACAACAGGGTGCTCACAGCA<br>AGGCCTAG    | AGATATAGTAGAGTGGTAGCTCTCCATTCTCACCATATTCGC<br>TTC  |
| B4P9  | CCTCAACCTACCTCCAACAATTCCTGTCCCCTGCGG<br>TTTCTACC    | CTGACAAAAGACCCTTTGCGGAGGGTATTCTCACCATATTCGC<br>TTC |
| B4P10 | CCTCAACCTACCTCCAACAACAGACTTCCACCGGT<br>TCTGGGCA     | GGCCCGTAGGAGAGACACCTTTCTATTCTCACCATATTCGC<br>TTC   |
